# Supplementary material
Source: PubMed Central journal article supplement (PMC7612297)

# Extended Figure 10c

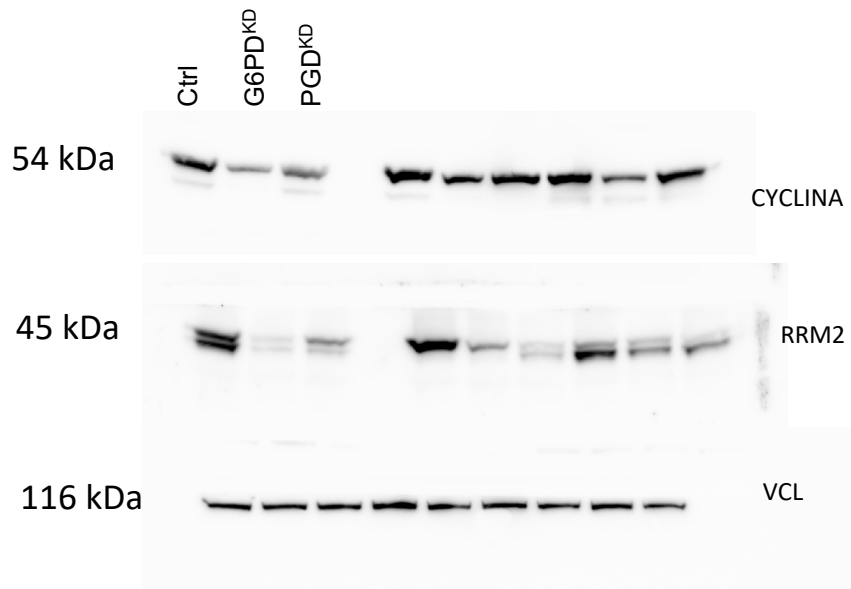

Supplement: EMS140518-supplement-Facchinello_Unmodified_Gels_ED_Fig10_pdf.pdf [file EMS140518-supplement-Facchinello_Unmodified_Gels_ED_Fig10_pdf.pdf]

# Extended Figure 1e

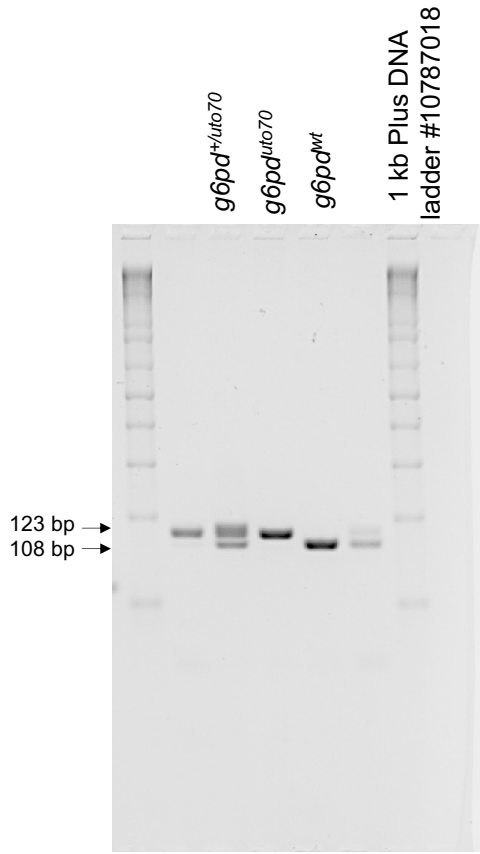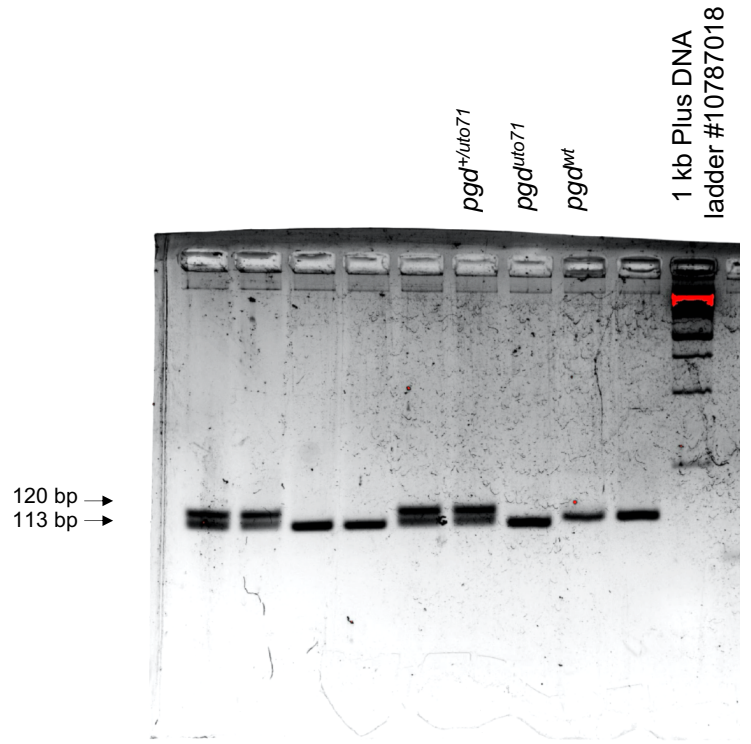

Supplement: EMS140518-supplement-Facchinello_Unmodified_Gels_ED_Fig1_pdf.pdf [file EMS140518-supplement-Facchinello_Unmodified_Gels_ED_Fig1_pdf.pdf]

# Extended Figure 3d

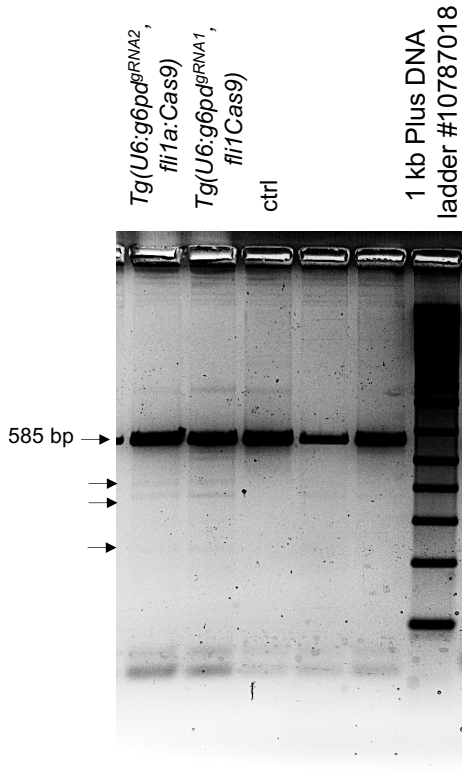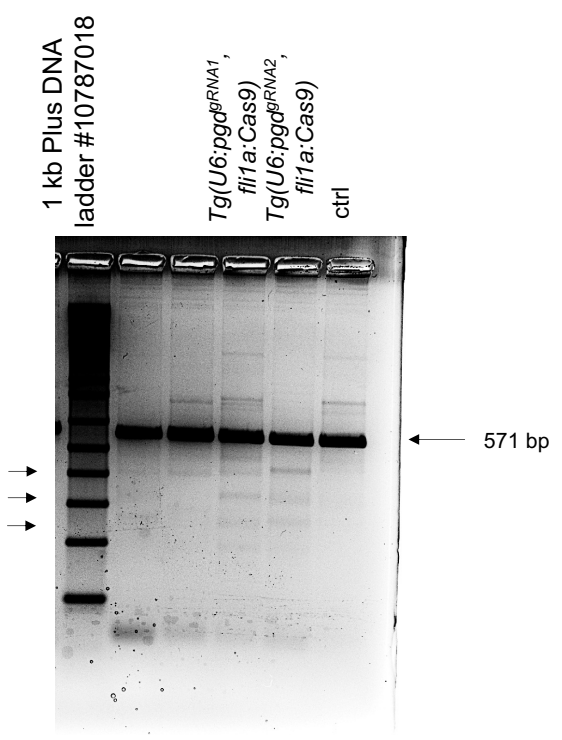

Supplement: EMS140518-supplement-Facchinello_Unmodified_Gels_ED_Fig3_pdf.pdf [file EMS140518-supplement-Facchinello_Unmodified_Gels_ED_Fig3_pdf.pdf]

# Extended Figure 4b

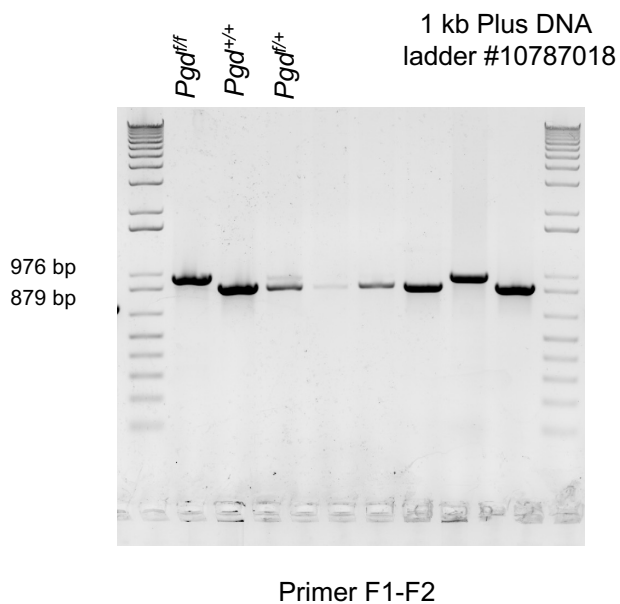

# Extended Figure 4c

1 kb Plus DNA ladder #10787018

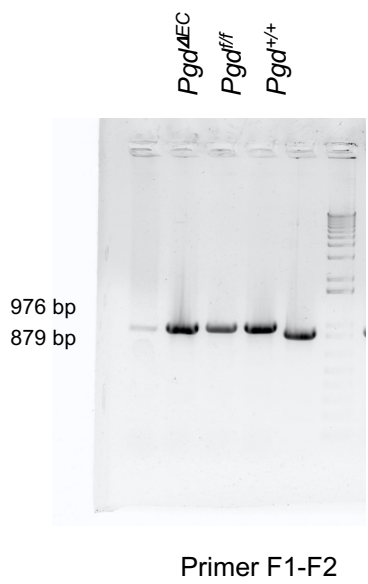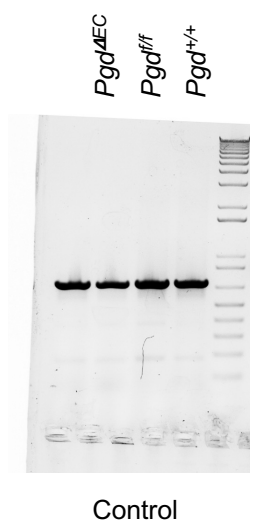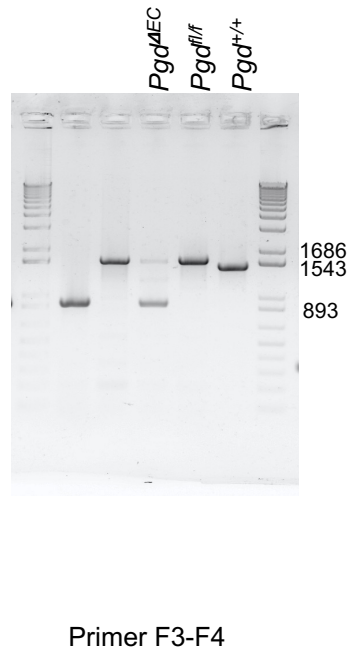

Supplement: EMS140518-supplement-Facchinello_Unmodified_Gels_ED_Fig4_pdf.pdf [file EMS140518-supplement-Facchinello_Unmodified_Gels_ED_Fig4_pdf.pdf]

## Extended Figure 6c

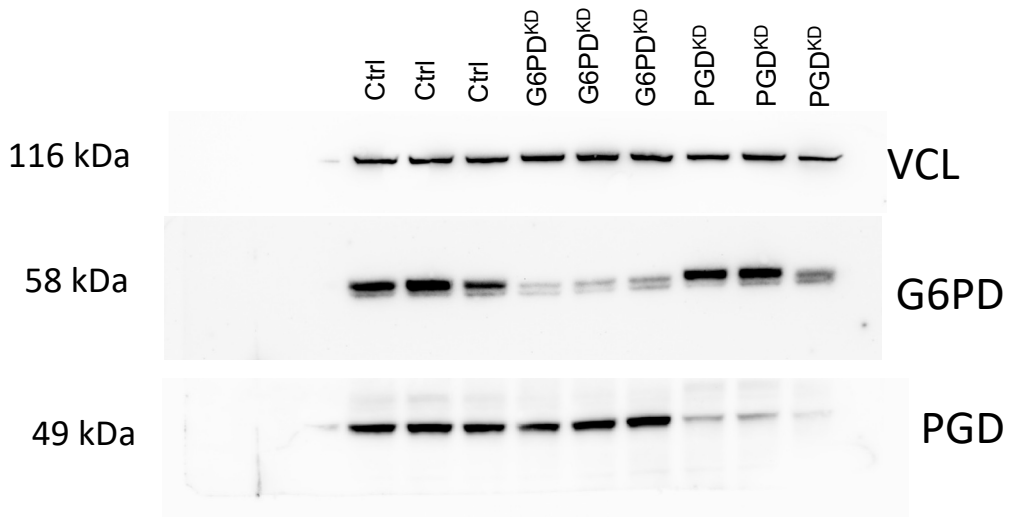

## Extended Figure 6h

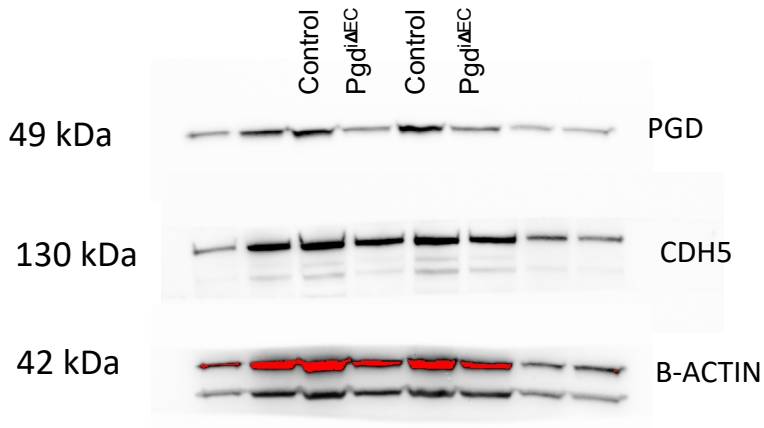

Supplement: EMS140518-supplement-Facchinello_Unmodified_Gels_ED_Fig6_pdf.pdf [file EMS140518-supplement-Facchinello_Unmodified_Gels_ED_Fig6_pdf.pdf]

Extended Figure 8d

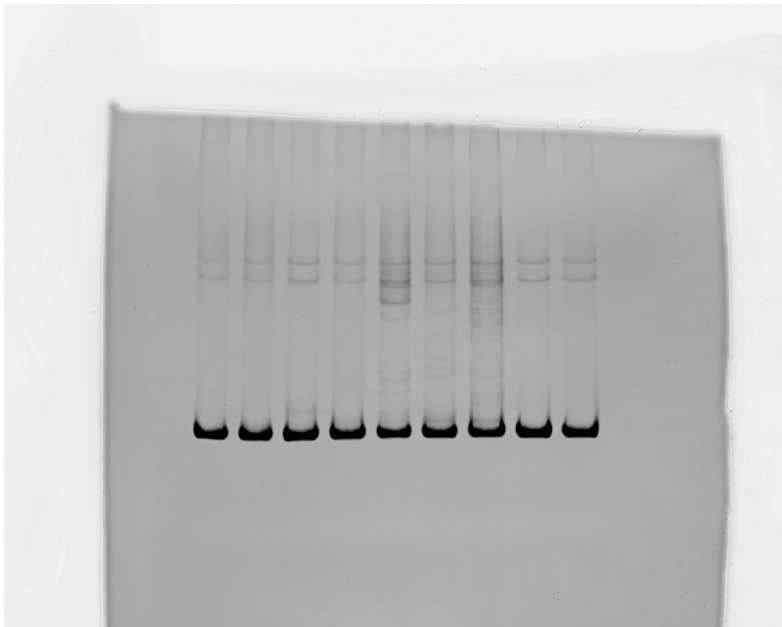

← 166 bp

Supplement: EMS140518-supplement-Facchinello_Unmodified_Gels_ED_Fig8_pdf.pdf [file EMS140518-supplement-Facchinello_Unmodified_Gels_ED_Fig8_pdf.pdf]

Figure 4h

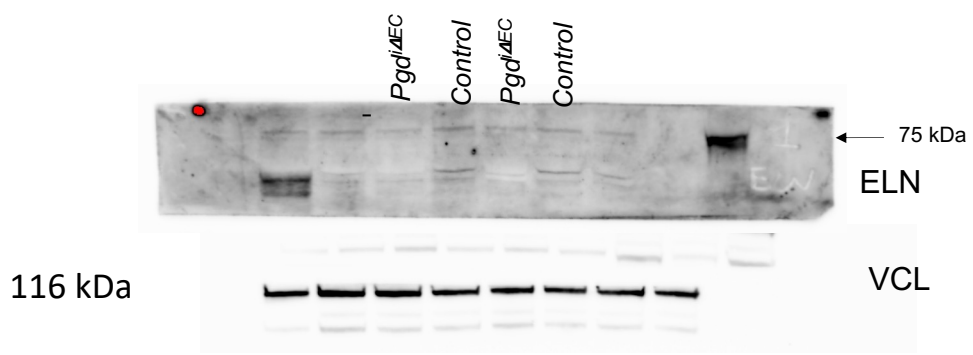

Supplement: EMS140518-supplement-Facchinello_Unmodified_Gels_Fig4_pdf.pdf [file EMS140518-supplement-Facchinello_Unmodified_Gels_Fig4_pdf.pdf]
